# Supplementary figures and images for: Computational investigations of the binding mechanism of novel benzophenone imine inhibitors for the treatment of breast cancer
Source: Royal Society of Chemistry journal article supplement (doi:10.1039/c9ra04759j), 2019-01-01

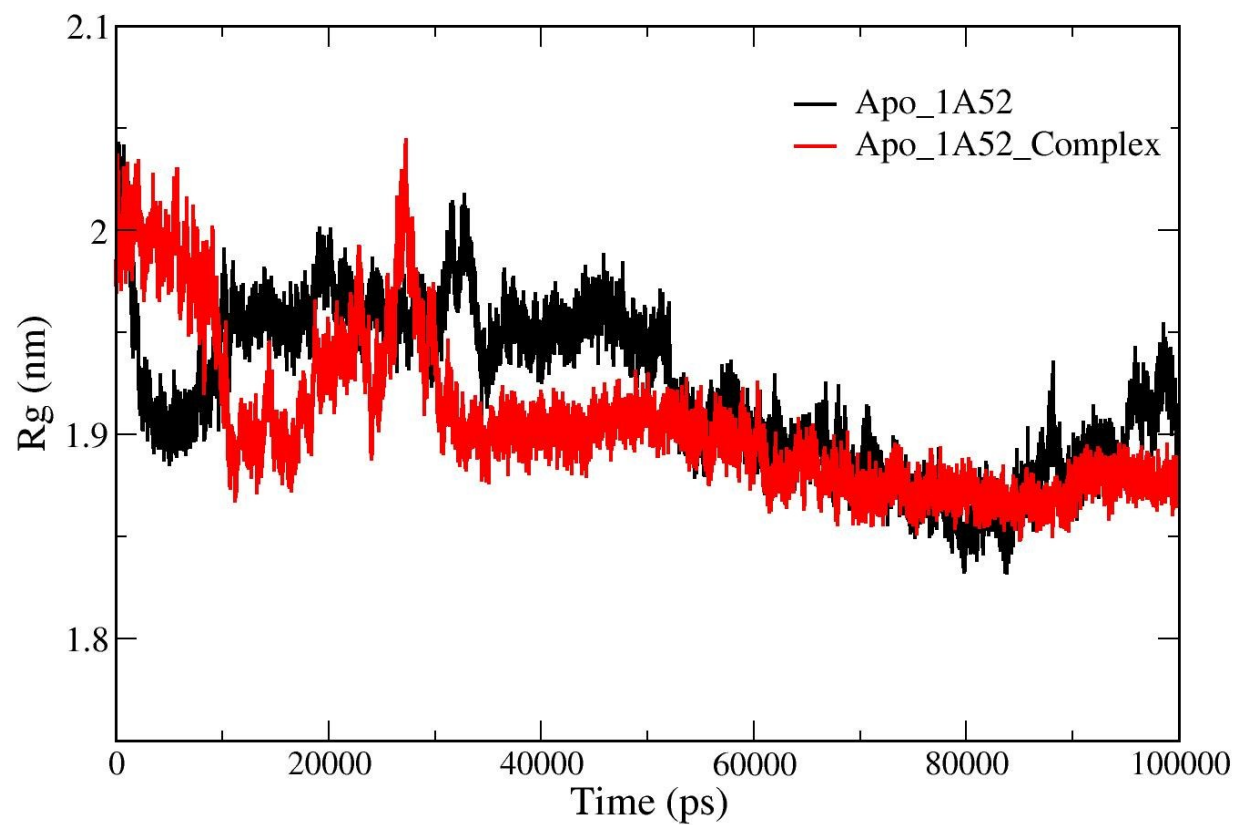

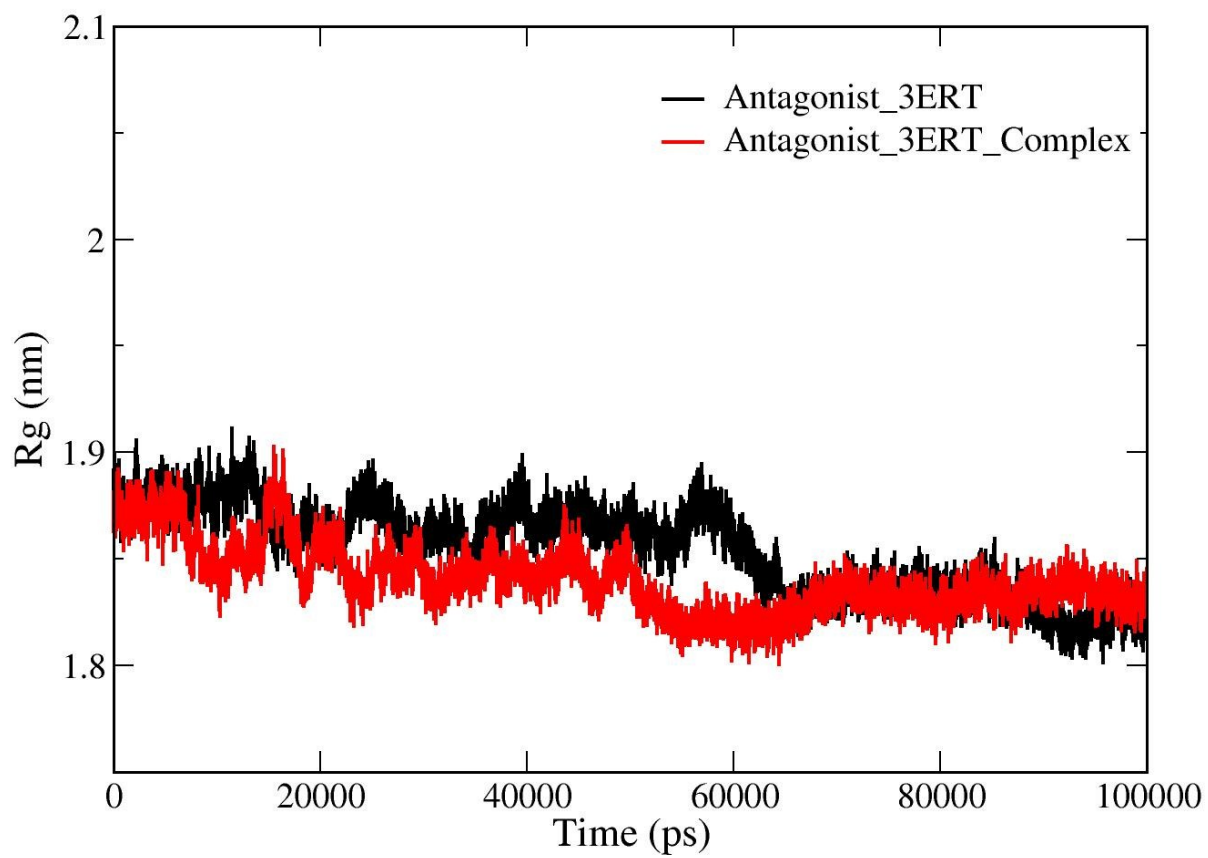

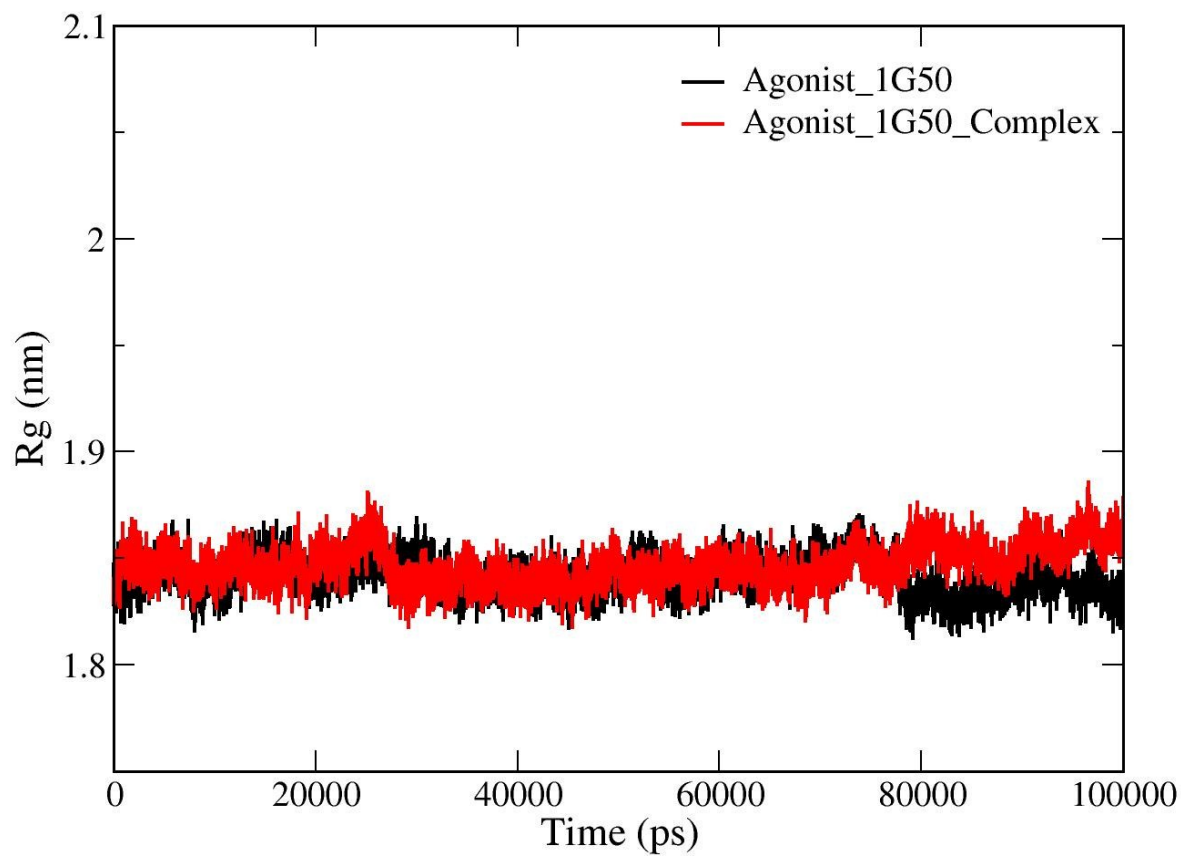

Figure S1

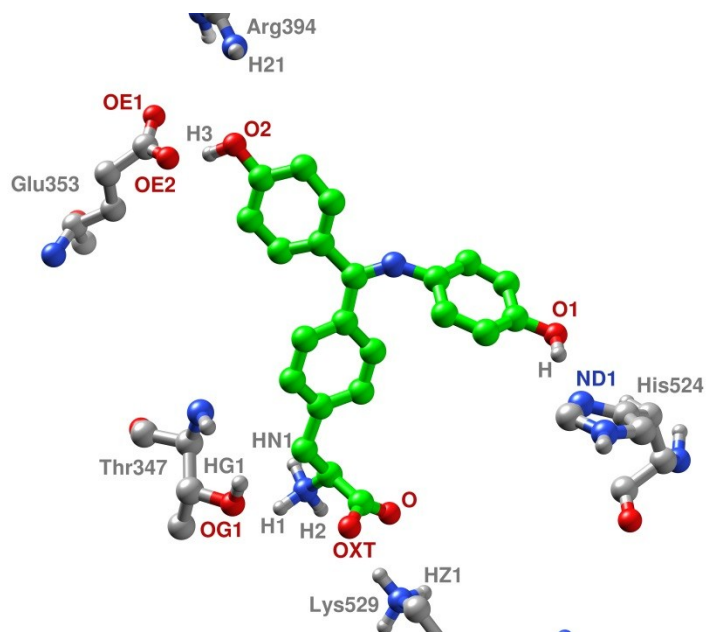

Figure S2\_a\_Apo

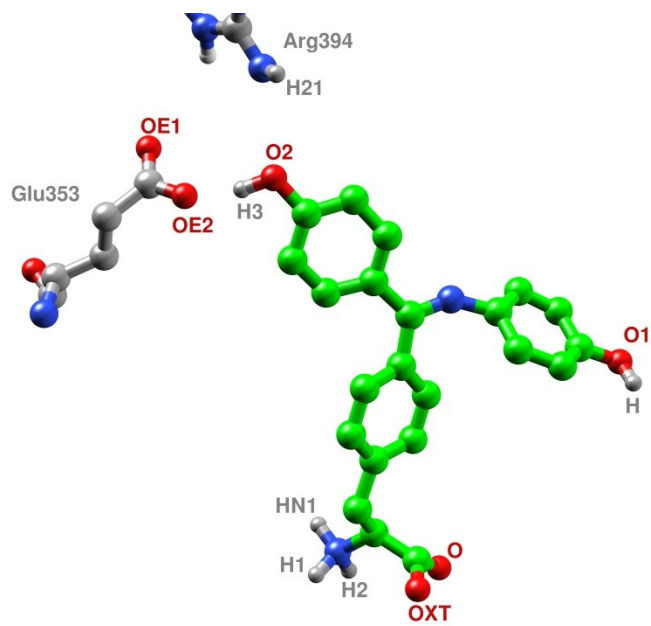

Figure S2\_b\_Antagonist

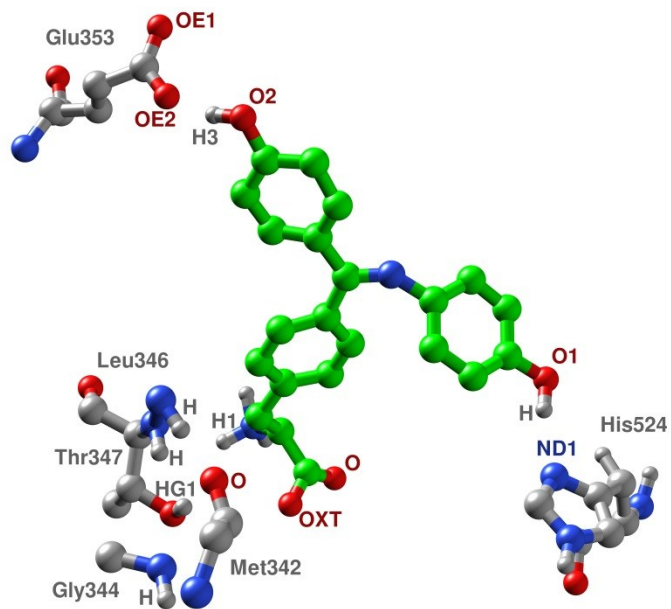

Figure S2\_c\_Agonist

Supplement: c9ra04759j1.pdf [file c9ra04759j1.pdf]
